# Supplementary material for: A Personalized Patient Page
Source: Atypon-hosted journal article supplement (doi:10.1176/appi.ps.201300181), 2013-10-01
Supplement: 1067_ds001.pdf [file 1067_ds001.pdf]

 


Psychiatry Online
