# Supplementary material for: A Personalized Patient Page
Source: Atypon-hosted journal article supplement (doi:10.1176/appi.ps.201300181), 2013-10-01

**FIGURES 1**

Title: Example of what a personalized patient page could look like for a patient suffering from depression.

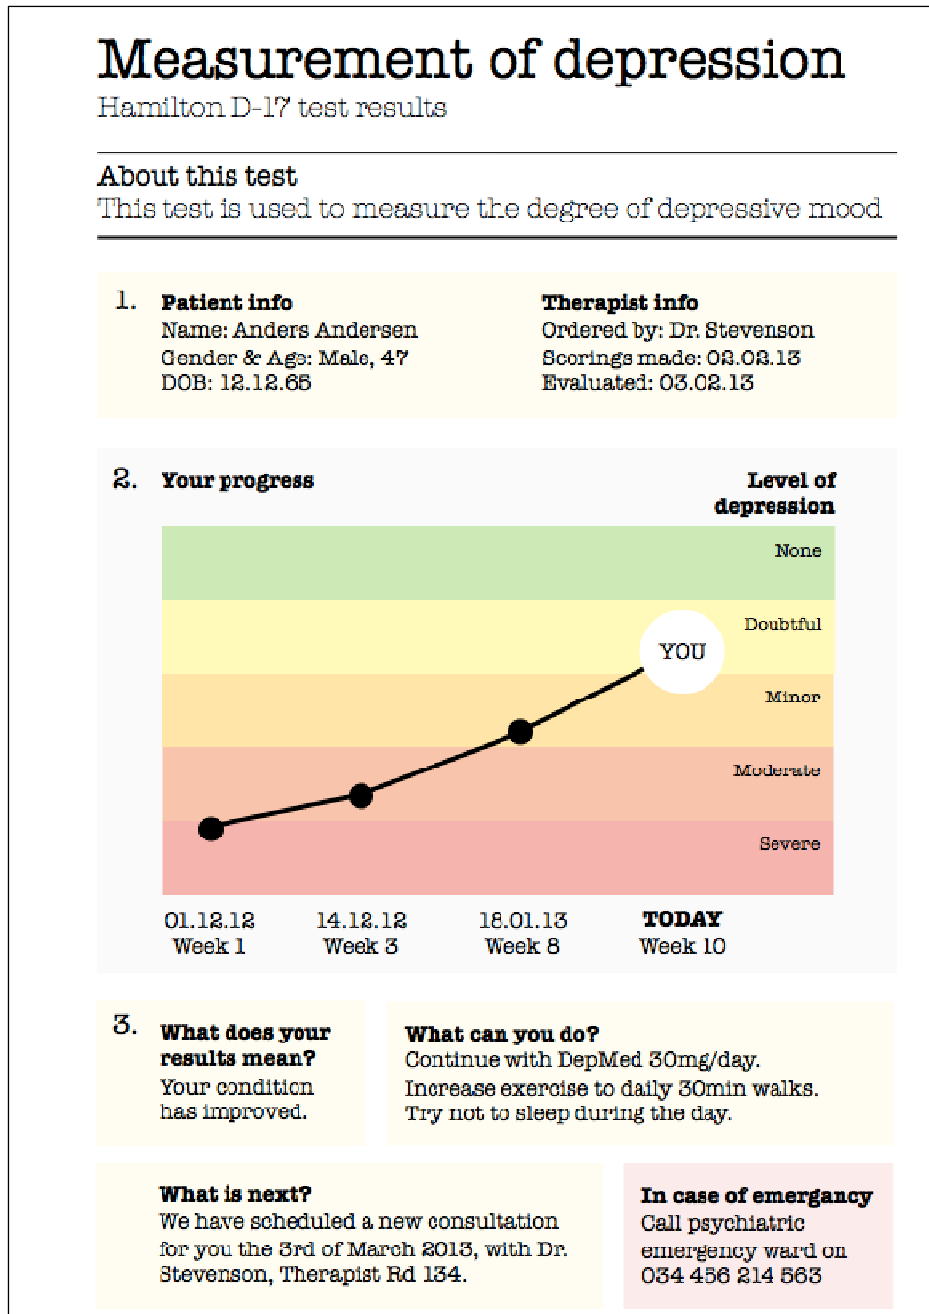

Supplement: 1067_ds001.pdf [file 1067_ds001.pdf]
